# Supplementary material for: Compound C Inhibits Ovarian Cancer Progression via PI3K-AKT-mTOR-NFκB Pathway
Source: MDPI journal article supplement (doi:10.3390/cancers14205099), 2022-10-18
Supplement: s1 [file s1]

**Table S1. List of Antibodies Used**

| Primary and secondary Antibodies                                           | Catalog #  | Dilution        | Molecular weight | Application |
|----------------------------------------------------------------------------|------------|-----------------|------------------|-------------|
| Rabbit mTOR (7C10) (Cell Signaling Technology CST, Danvers, MA)            | 2983       | 1:1000<br>1:50  | 289kDa           | WB<br>IHC   |
| Rabbit Phospho-mTOR (Ser2448) (D9C2) (CST)                                 | 5536       | 1:500           | 189kDa           | WB          |
| Rabbit Anti-p70 S6 Kinase (S6K) (Sigma)                                    | 06-926     | 1:1000          | 70kDa            | WB          |
| Rabbit Phospho-p70 S6 Kinase (Thr389) (108D2) (CST)                        | 9234       | 1:500           | 70kDa            | WB          |
| Rabbit AKT (CST)                                                           | 9272       | 1:1000          | 60kDa            | WB          |
| Rabbit Phospho-AKT (Ser473) (CST)                                          | 4060       | 1:500<br>1:100  | 60kDa            | WB<br>IHC   |
| Rabbit HSP90 (CST)                                                         | 4874       | 1:1000          | 90kDa            | WB          |
| Rabbit NFκB p65 (D14E12) XP (CST)                                          | 8242       | 1:1000<br>1:200 | 65kDa            | WB<br>IHC   |
| Rabbit Phospho-NFκB p65 (Ser536) (93H1) (CST)                              | 3033       | 1:500           | 65kDa            | WB          |
| Rabbit PI3 Kinase p85 (19H8) (CST)                                         | 4257       | 1:1000          | 85kDa            | WB          |
| Rabbit PI3 Kinase 110α (C73F8) (CST)                                       | 4249       | 1:500           | 110kDa           | WB          |
| Rabbit polyclonal PI3 Kinase p110α (Proteintech Group, Inc., Rosemont, IL) | 20583-1-AP | 1:50            | 110kDa           | IHC         |
| Rabbit IgG HRP Linked Whole Ab (Novus Biologicals, LLC, Centennial, CO)    | NA934      | 1:1000          | --               | WB          |
| Rabbit IKKα (D3W6N) (CST)                                                  | 61294      | 1:500           | 85kDa            | WB          |
| β-Actin loading control monoclonal antibody (BA3R; Invitrogen)             | MA5-15739  | 1:5000          | 42kDa            | WB          |
| Rabbit CD31 (NovusBio)                                                     | NB100-2284 | 1:50            | 82.5 kDa         | IHC         |
| Rabbit Ki67 (NovusBio)                                                     | NB500-170  | 1:100           | 319 kDa          | IHC         |
| Mouse RelA/p65 (CST)                                                       | 6956s      | 1:100           | 65 kDa           | IHC         |
| Mouse CD68 (NovusBio)                                                      | NB100-683  | 1:200           | 110kDa           | IHC         |
| Rabbit Alexa Flour 594 Conjugate (Invitrogen)                              | 8889       | 1:500           | --               | IF          |
| Rabbit Alexa Flour 488 Conjugate (Invitrogen)                              | 7395       | 1:400           | --               | IF          |

**Table S2: List of primers used:**

| Gene | Forward Primer sequence [5'-3'] Oligo | Reverse Primer sequence [5'-3'] Oligo |
|------|---------------------------------------|---------------------------------------|
| IL6  | TACCCCCAGGAGAAGATTCC                  | GCCATCTTTGGAAGGTTCA                   |
| CCL2 | CCCCAGTCACCTGCTGTTAT                  | GAGTTTGGGTTTGCTTGTC                   |
| IL8  | GTGCAGTTTTGCCAAGGAGT                  | CTCTGCACCCAGTTTTCTT                   |
| TNFα | AACCTCCTCTGCCATCAA                    | CCAAAGTAGACCTGCCAGA                   |
| VEGF | CCTTGCTGCTCTACCTCCAC                  | CACACAGGATGGCTGAAGA                   |
| IL1b | CAGAAGTACCTGAGCTCGCC                  | AGATTCGTAGCTGGATGCCG                  |
| 18S  | GCGGTTCTATTTGTTGGTTT                  | CTCCGACTTTCGTTCTTGATT                 |

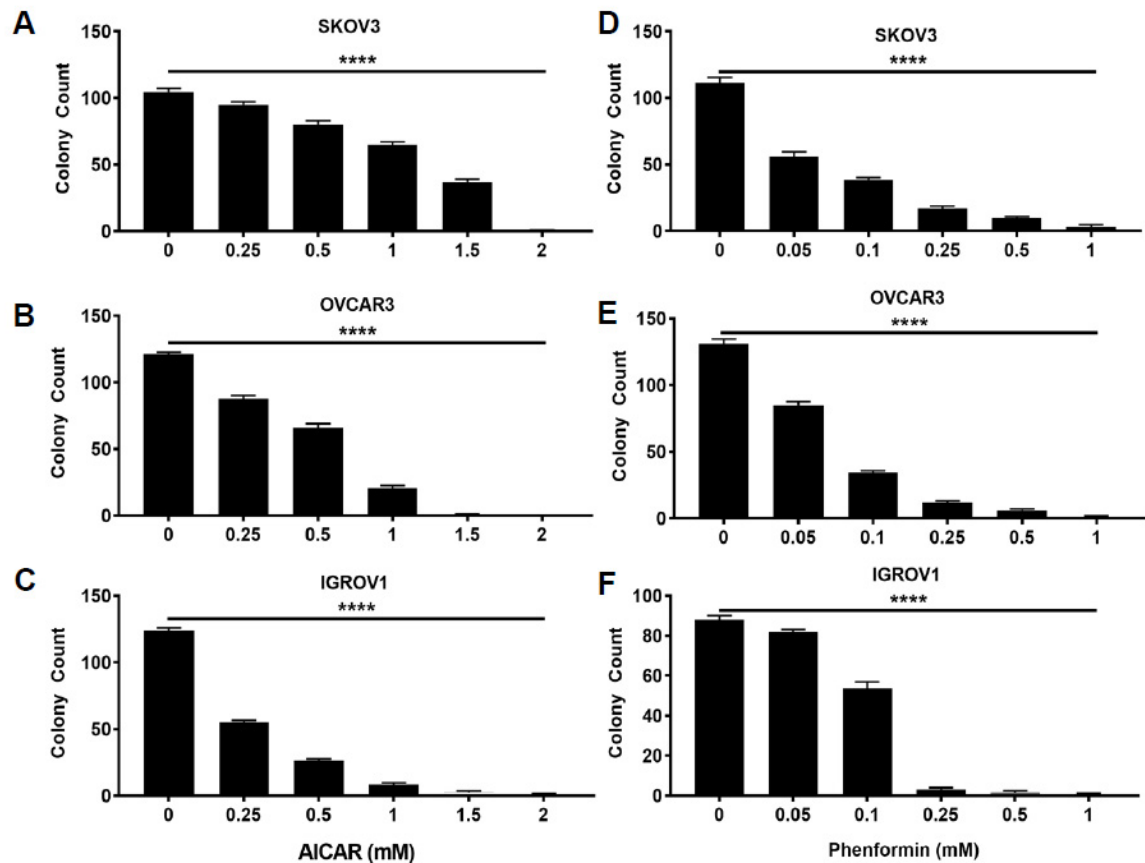

**Figure S1.** Effects of phenformin and AICAR on colony formation of OvCa cell lines. A–C. SKOV3, OVCAR3, and IGROV1 were treated with AICAR (0–2mM), and D–E. phenformin (0–1mM). All experiments were performed in triplicates/experimental condition and were repeated at least twice; \*\*\*\* $p < 0.0001$ , one way ANOVA).

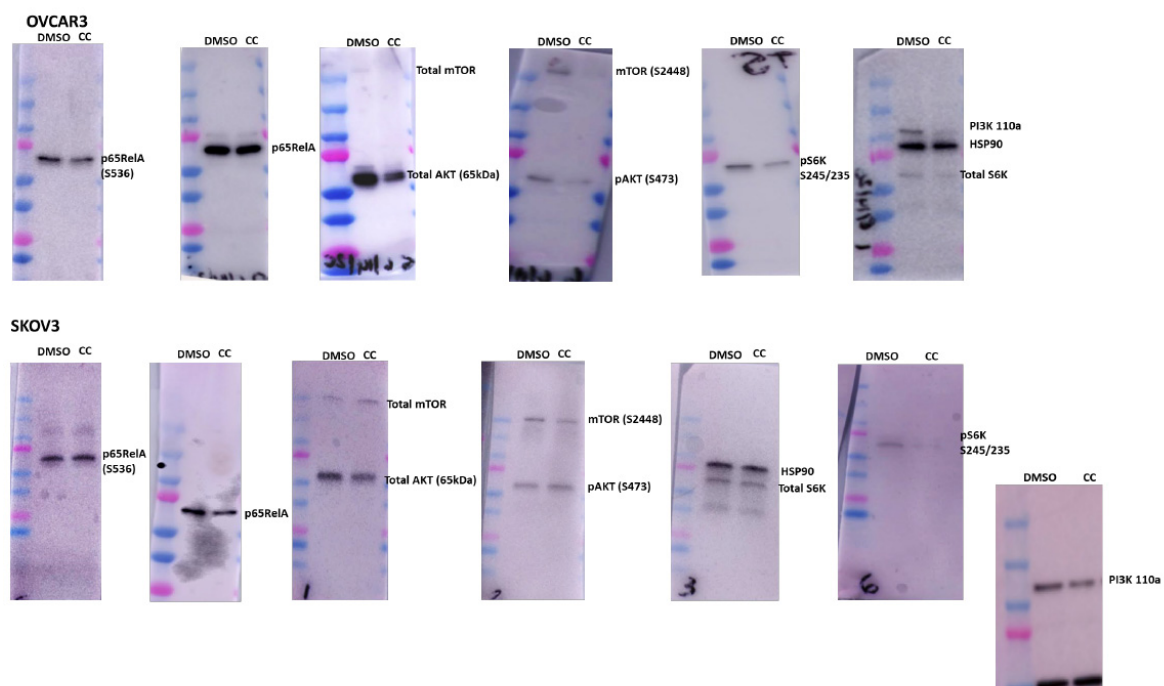

**Figure S2.** Full WBs of Figure 4C.

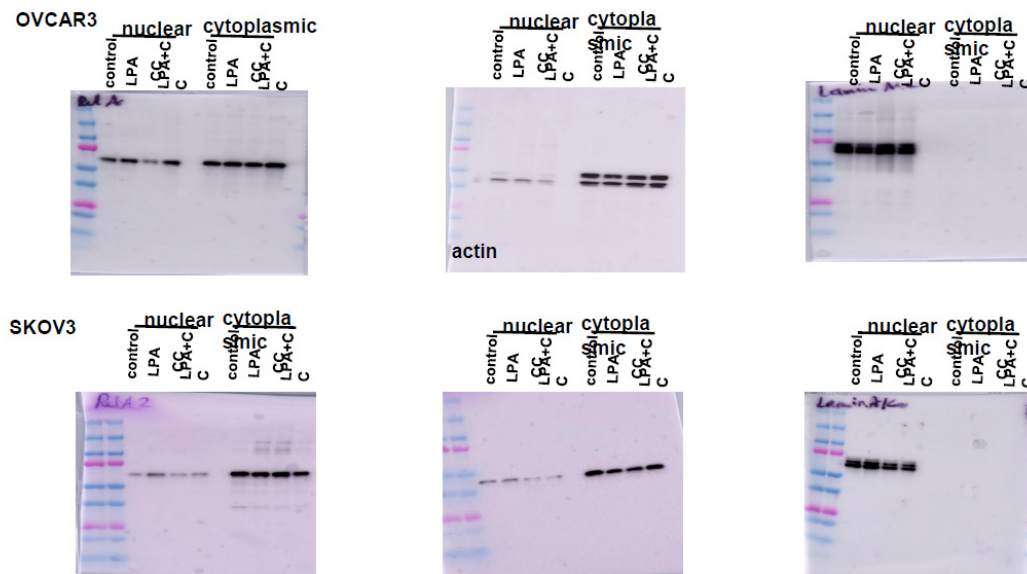

Figure S3. Full WBs of Figure 4D.

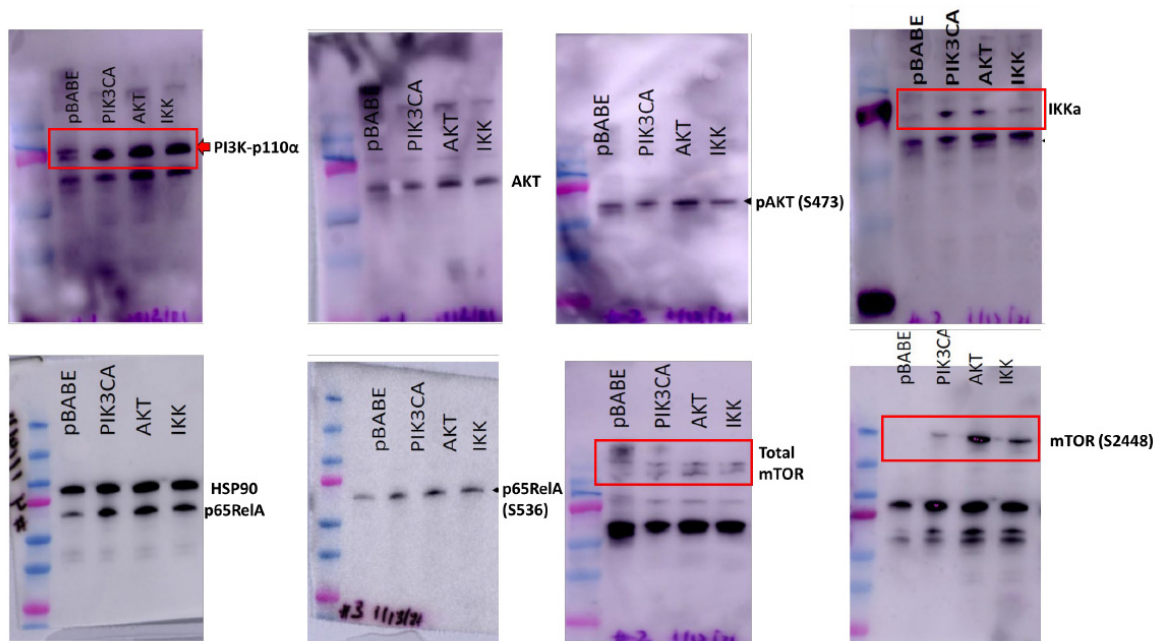

Figure S4. Full WBs of Figure 6A.

# MESO301

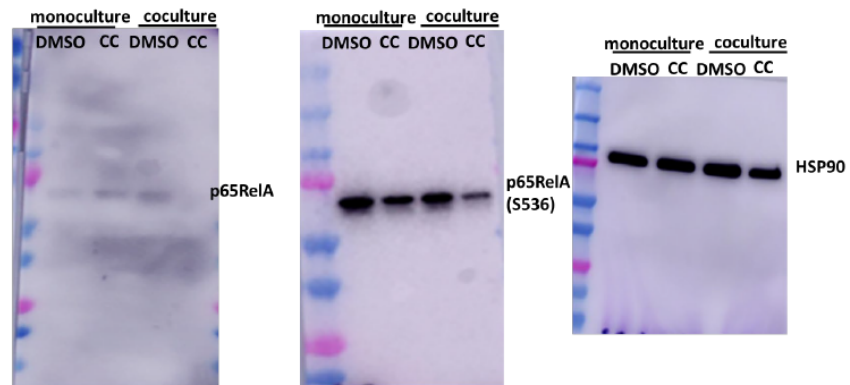

# SKOV3

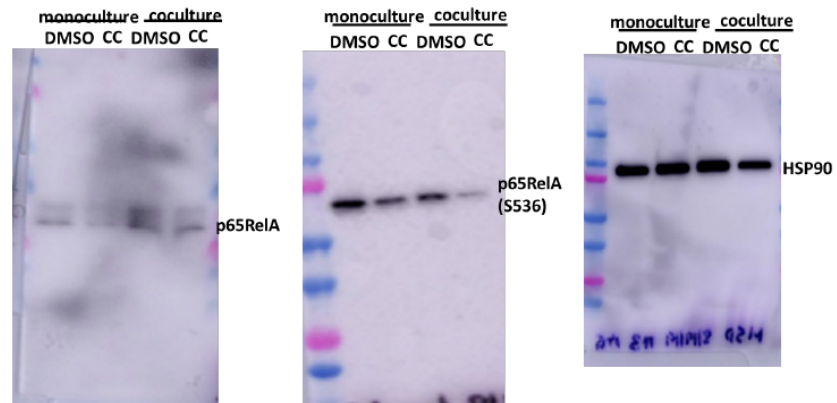

Figure S5. Full WBs of Figure 7D.

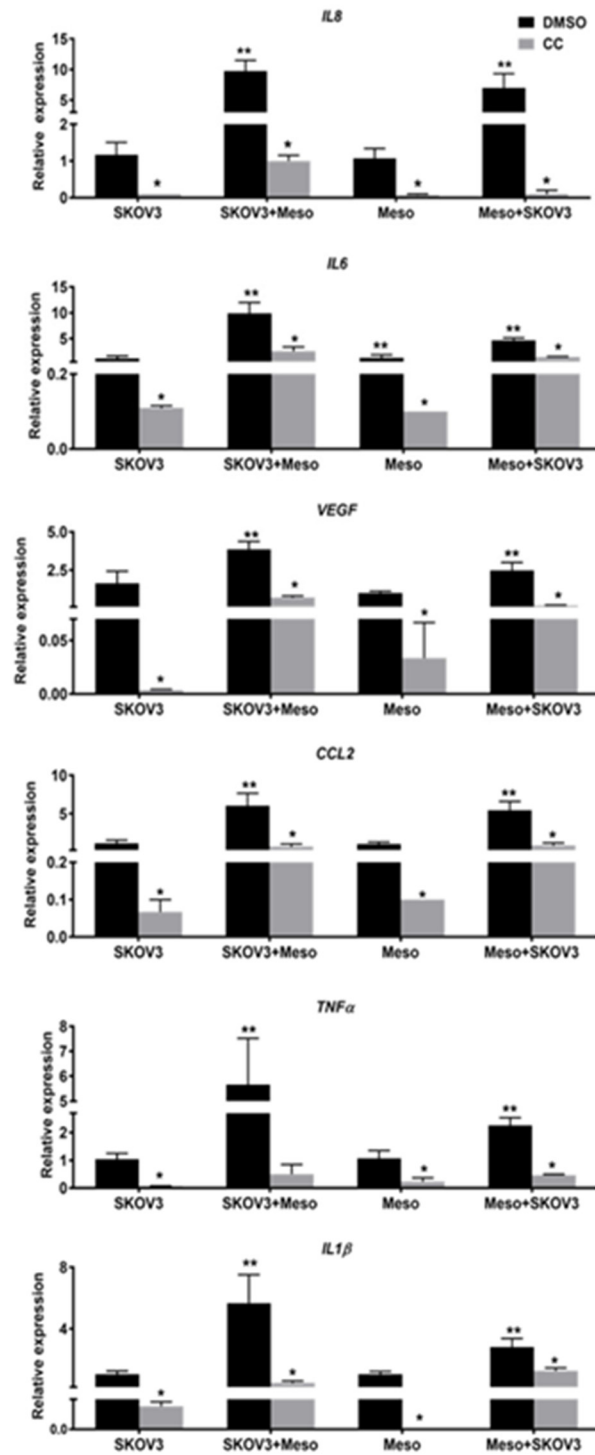

**Figure S6. Effect of CC on the expression of NFkB target genes in SKOV3 and mesothelial cells in mono- and co-cultures.** Bars represent the means  $\pm$  SEM of the relative expression of the transcripts of the indicated genes determined by qRT-PCR. \* $p < 0.05$ , comparing CC- to DMSO-treated cells. \*\* $p < 0.05$ , comparing cells in mono- to cocultures, multiple  $t$ -tests.

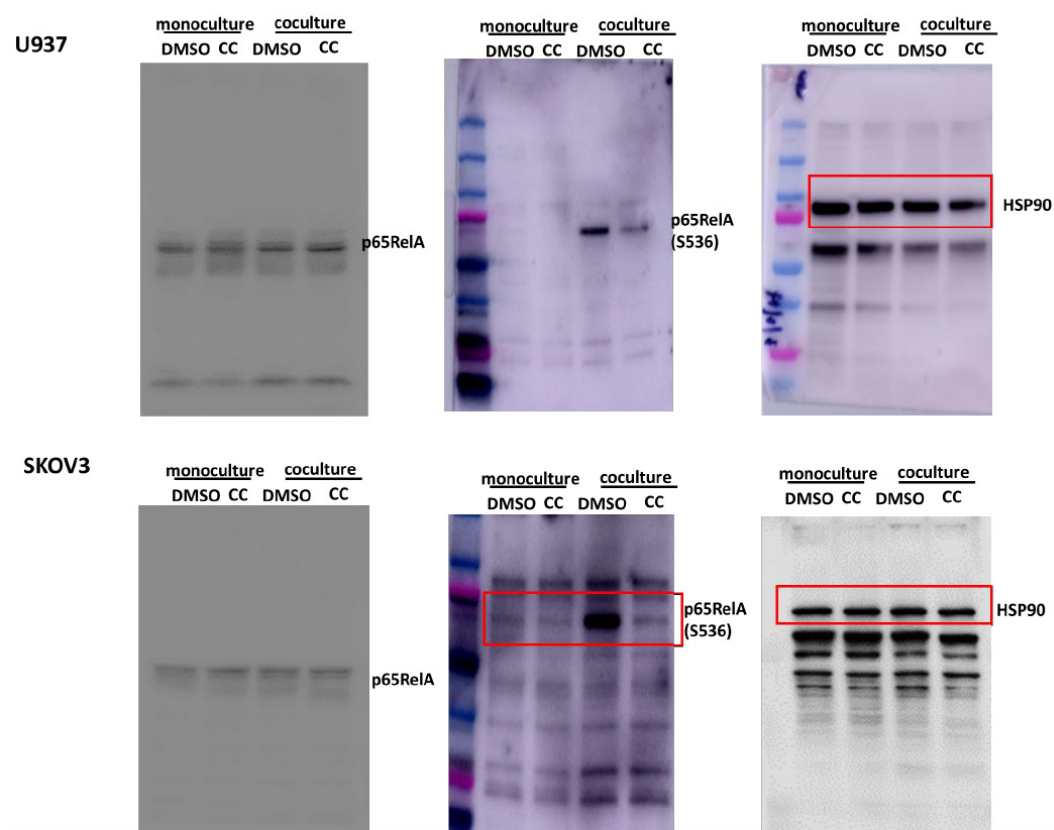

**Figure S7.** Full WBs of Figure 8C.

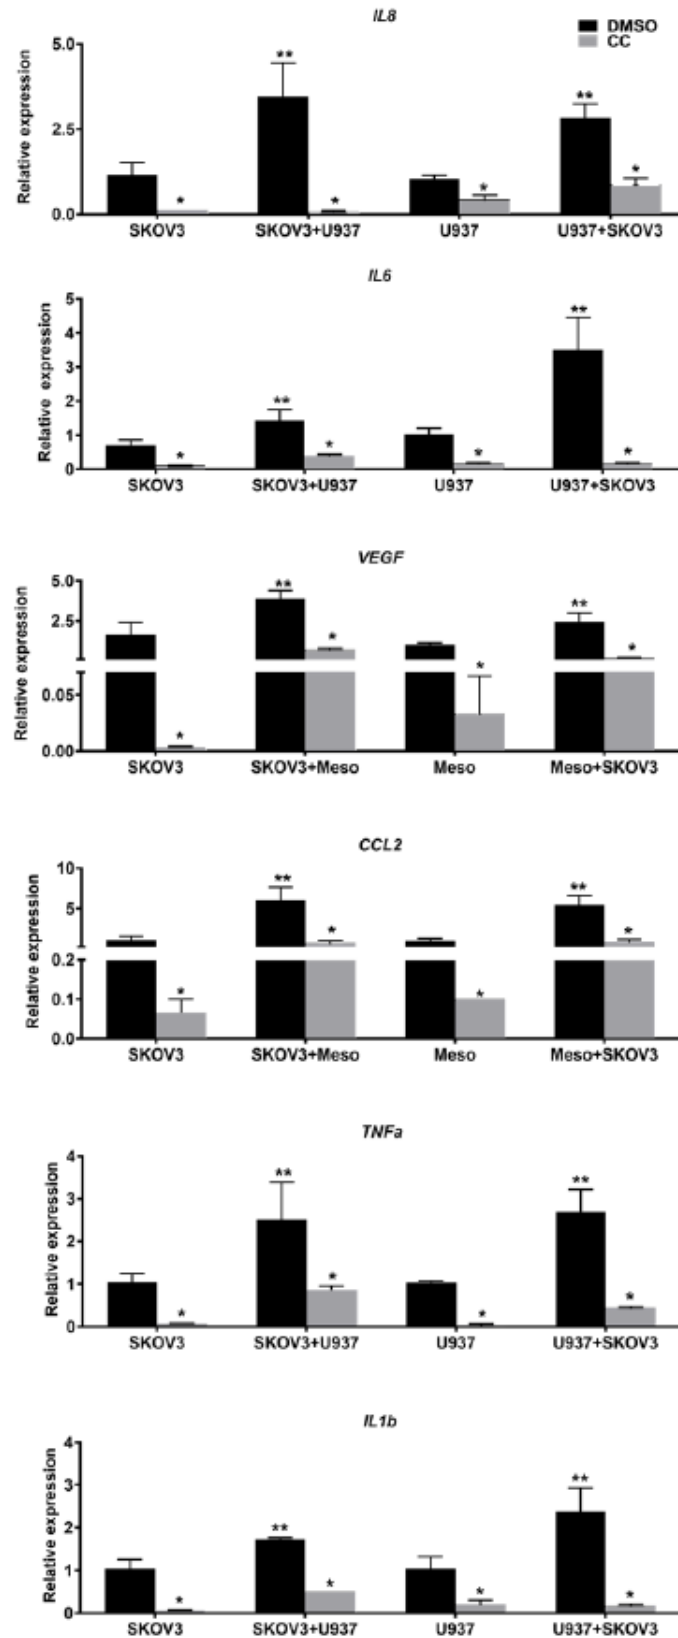

Figure S8. Effect of CC on the expression of NFκB target genes in SKOV3 and U937 macrophages in mono- and co-cultures. Bars represent the means ± SEM of the relative expression of the transcripts of the indicated genes determined by qRT-PCR. \* $p < 0.05$ , comparing CC- to DMSO-treated cells. \*\* $p < 0.05$ , comparing cells in mono- to co-cultures, multiple  $t$ -tests.



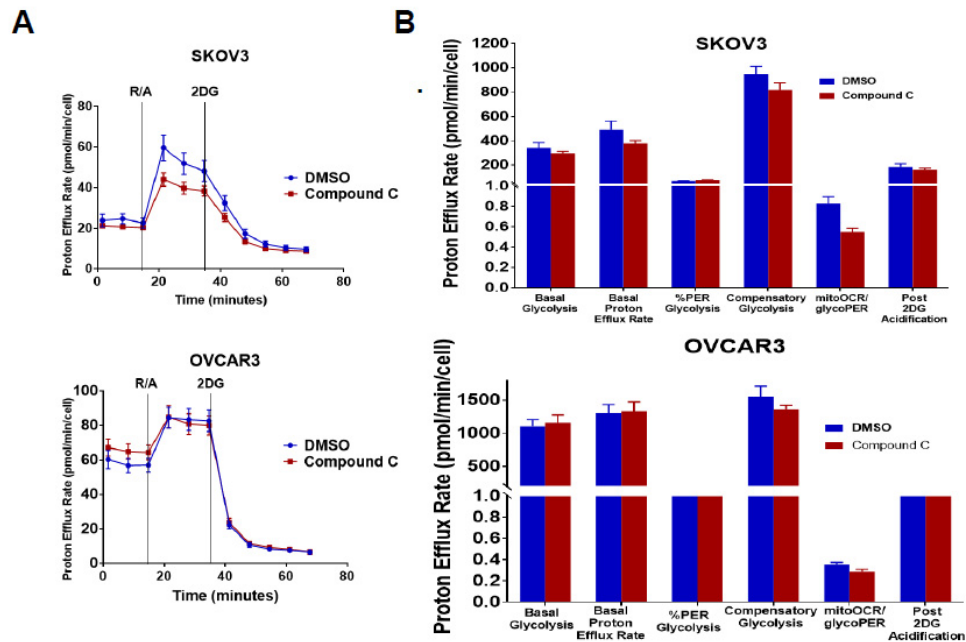

**Figure S9. The Effect of CC on glycolytic rate.** A. Seahorse tracing of the proton efflux rate in SKOV3 and OVCAR3 treated with 5 $\mu$ M of CC for 18hr, as described in material and methods. B. Bars representing means  $\pm$  SEM of the basal and compensatory glycolysis, post 2DG acidification, basal proton efflux rate, %PER from glycolysis and mitoOCR/glycoPER ratio in SKOV3 and OVCAR3 cells treated with CC. A-B are representatives of 3 experiments (n=3/experimental condition) \* $p$  < 0.05, Student's  $t$ -test.

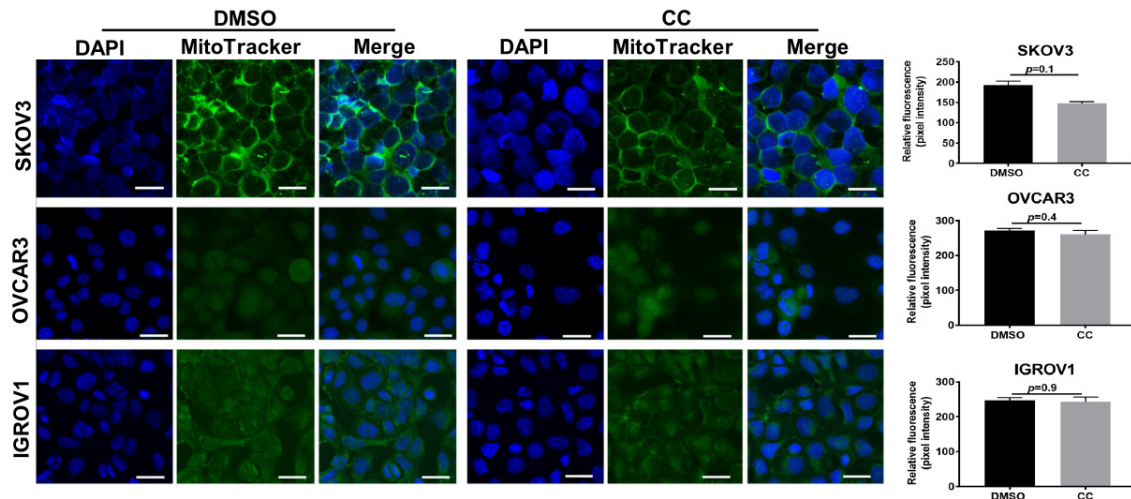

**Figure S10. The effect of CC on mitochondrial mass.** A. Confocal microscopy images of MitoTracker and merged images of SKOV3, OVCAR3 and IGROV1 cells treated with CC or DMSO control for 18hrs (scale bar, 10 $\mu$ m) B. Bar graphs represent means  $\pm$  SEM of quantifies fluorescent pixel intensity of using Image J.  $p$ -values are determined by Student's  $t$ -test, comparing CC- to DMSO-treated groups.



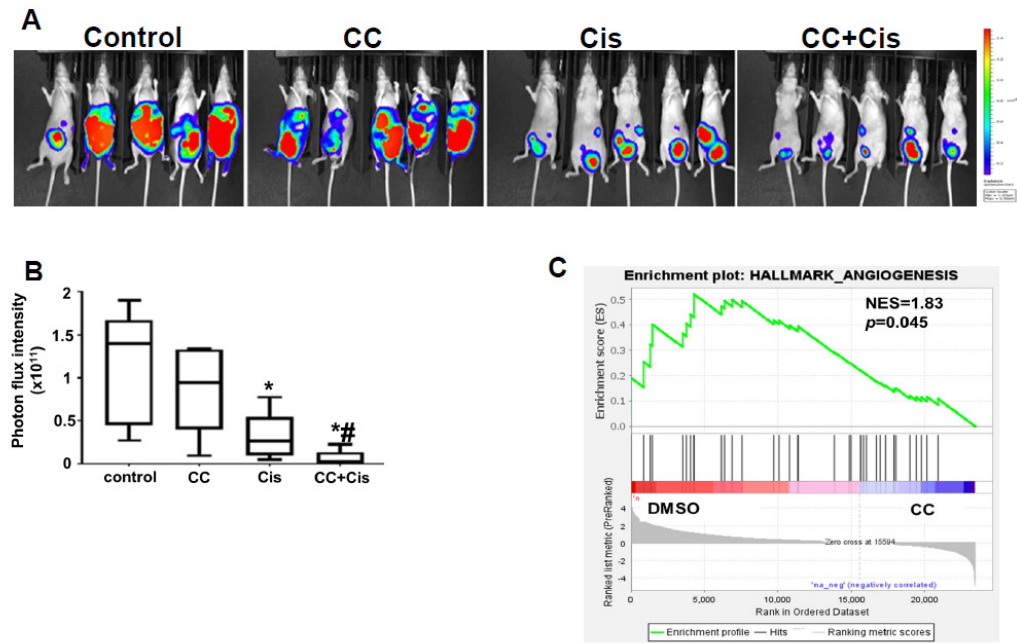

**Figure S11. A.** IVIS imaging of tumor-bearing mice 8-weeks after ip injection of SKOV3-luc, and **B.** box plots of the quantification of the photon flux/second in the experimental cohorts. \* $p<0.05$ , compared to the vehicle control. # $p<0.05$  compared to monotherapy with either cisplatin (cis) and CC, Mann-Whitney's test. **C.** GSEA analysis of SKOV3 cells treated with CC showing enrichment of a signature of angiogenesis.
